# Supplementary material
Source: publisher site journal article supplement (https://www.degruyterbrill.com/publication/isbn/9783110272901/downloadAsset/9783110272901_Inhaltsverzeichnis.pdf)
Supplement: Supplementary file 1 [file 9783110272901_Inhaltsverzeichnis.pdf]

# Inhaltsverzeichnis

|                                                                                                                                      |   |
|--------------------------------------------------------------------------------------------------------------------------------------|---|
| CONSTANZE SPIEB, SUSANNE GÜNTNER UND DAGMAR HÜPPER<br>Perspektiven der Genderlinguistik -<br>eine Einführung in den Sammelband ..... | 1 |
|--------------------------------------------------------------------------------------------------------------------------------------|---|

## Theoretische Hintergründe und methodische Implikationen

|                                                                                                                     |    |
|---------------------------------------------------------------------------------------------------------------------|----|
| HILDEGARD MACHA<br>Konstruktionen der Geschlechtsidentität –<br>Widersprüche aktueller Sozialisationsprozesse ..... | 31 |
|---------------------------------------------------------------------------------------------------------------------|----|

|                                                                                                             |    |
|-------------------------------------------------------------------------------------------------------------|----|
| CONSTANZE SPIEB<br>Linguistische Genderforschung und Diskurslinguistik.<br>Theorie – Methode – Praxis ..... | 53 |
|-------------------------------------------------------------------------------------------------------------|----|

|                                                                                                                                                                |    |
|----------------------------------------------------------------------------------------------------------------------------------------------------------------|----|
| HEIKO MOTSCHENBACHER<br>Queere Linguistik: Theoretische und methodologische<br>Überlegungen zu einer heteronormativitätskritischen<br>Sprachwissenschaft ..... | 87 |
|----------------------------------------------------------------------------------------------------------------------------------------------------------------|----|

## Geschlechter in medialen Zusammenhängen

|                                                                                                                          |     |
|--------------------------------------------------------------------------------------------------------------------------|-----|
| CHRISTINE DOMKE<br>Love sells – Überlegungen zur (non)-verbalen Inszenierung<br>von Paaren in aktuellen Werbespots ..... | 129 |
|--------------------------------------------------------------------------------------------------------------------------|-----|

|                                                                                                            |     |
|------------------------------------------------------------------------------------------------------------|-----|
| MARIE-LOUISE BUKOP UND DAGMAR HÜPPER<br>Geschlechterkonstruktionen im deutschsprachigen<br>Porno-Rap ..... | 159 |
|------------------------------------------------------------------------------------------------------------|-----|

|                                                                                               |     |
|-----------------------------------------------------------------------------------------------|-----|
| BIRGIT EICKHOFF<br>„Frauen in den Duden“ –<br>Werkstattbericht I aus der Dudenredaktion ..... | 195 |
|-----------------------------------------------------------------------------------------------|-----|

|                                                                                                                                                                                      |     |
|--------------------------------------------------------------------------------------------------------------------------------------------------------------------------------------|-----|
| KATHRIN KUNKEL-RAZUM<br>„Er sah zu ihr auf wie zu einer Göttin“ statt<br>„Sie sah zu ihm auf wie zu einem Gott“ (Luise Pusch)? –<br>Werkstattbericht II aus der Dudenredaktion ..... | 213 |
|--------------------------------------------------------------------------------------------------------------------------------------------------------------------------------------|-----|

|                                                                                                                                                               |     |
|---------------------------------------------------------------------------------------------------------------------------------------------------------------|-----|
| <b>Geschlechter in der Interaktion</b> .....                                                                                                                  | 221 |
| ELISA FRANZ UND SUSANNE GÜNTNER                                                                                                                               |     |
| Zur Konstruktion von Gender beim Speeddating:<br>Zwischen Relevanzrückstufung und Inszenierung .....                                                          | 223 |
| HELGA KOTTHOFF                                                                                                                                                |     |
| „Indexing gender“ unter weiblichen Jugendlichen in<br>privaten Telefongesprächen .....                                                                        | 251 |
| JANET SPRECKELS                                                                                                                                               |     |
| „wenn das 'n Mädchen gemacht hätt!“ –<br>Geschlechtsidentitäten zwischen Medien und Alltag .....                                                              | 287 |
| <b>Zum Zusammenspiel von Sprachsystem<br/>und Sprachgebrauch</b> .....                                                                                        | 317 |
| DAMARIS NÜBLING                                                                                                                                               |     |
| Von <i>Elisabeth</i> zu <i>Lilly</i> , von <i>Klaus</i> zu <i>Nico</i> :<br>Zur Androgynisierung und Infantilisierung der Rufnamen<br>von 1945 bis 2008 ..... | 319 |
| JULIANE SCHRÖTER, ANGELIKA LINKE UND NOAH BUBENHOFER                                                                                                          |     |
| „Ich als Linguist“ – Eine empirische Studie zur Einschätzung<br>und Verwendung des generischen Maskulinums .....                                              | 359 |
| KLAUS MICHAEL KÖPCKE UND DAVID ZUBIN                                                                                                                          |     |
| Mythopoeia und Genus .....                                                                                                                                    | 381 |
| SABURO OKAMURA                                                                                                                                                |     |
| Sprachliche Lösungsmöglichkeiten der Genderproblematik<br>im Japanischen und Deutschen .....                                                                  | 413 |
| Transkriptionskonventionen nach GAT .....                                                                                                                     | 433 |
| Sachregister .....                                                                                                                                            | 435 |
| Verzeichnis der Autorinnen und Autoren .....                                                                                                                  | 441 |
